# Supplementary material for: Epigenetically upregulated oncoprotein PLCE1 drives esophageal carcinoma angiogenesis and proliferation via activating the PI-PLCε-NF-κB signaling pathway and VEGF-C/ Bcl-2 expression
Source: PubMed Central journal article supplement (PMC6320601; doi:10.1186/s12943-018-0930-x), 2019-01-04

Fig. S2

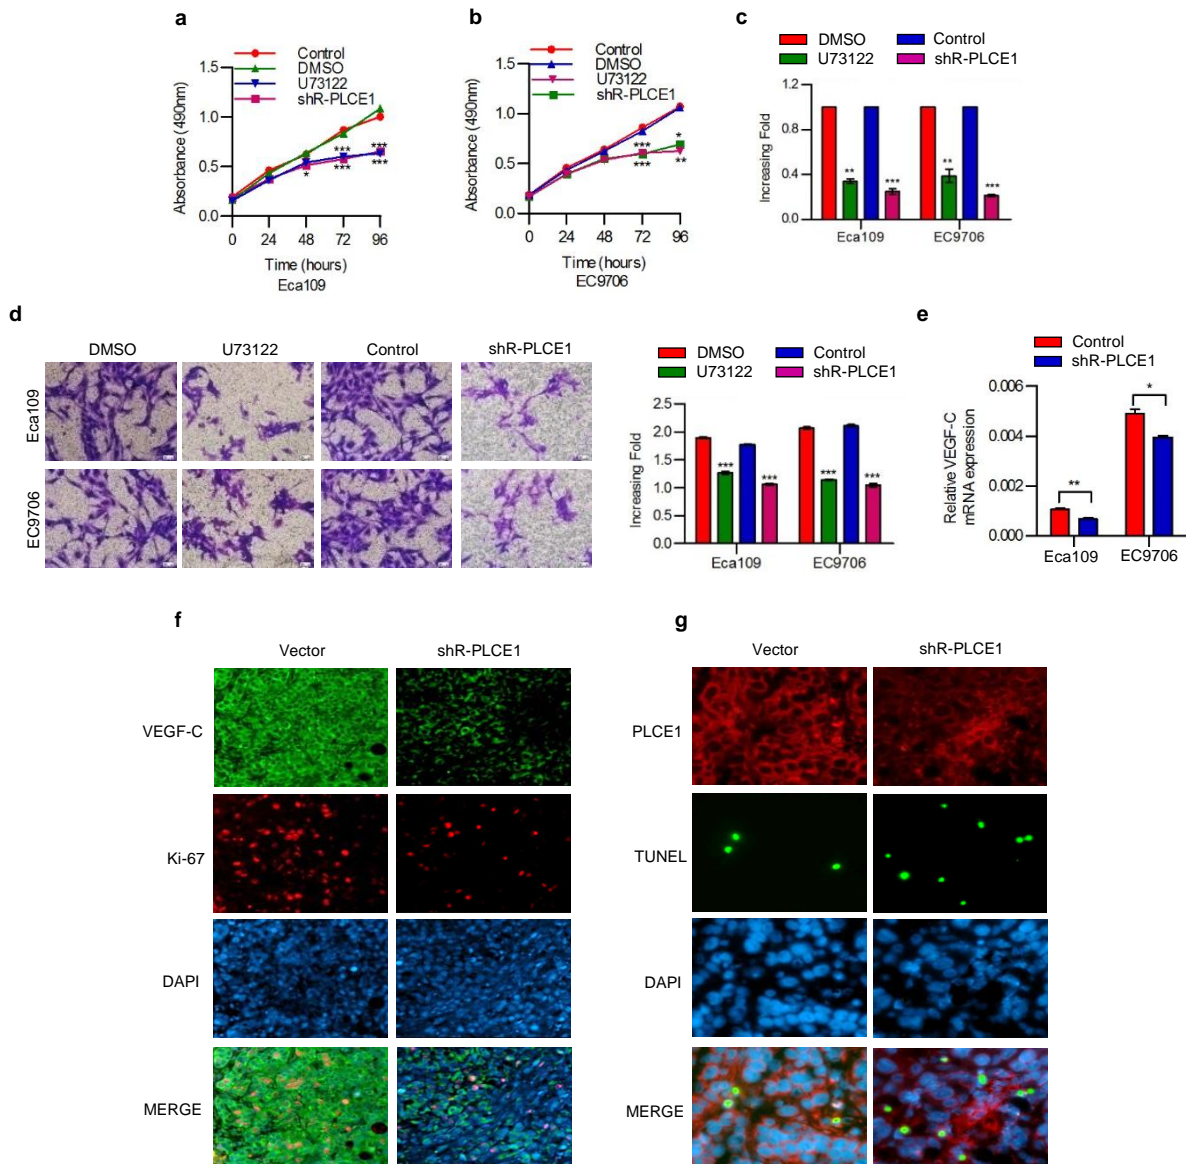

Supplement: 12943_2018_930_MOESM3_ESM.pdf [file 12943_2018_930_MOESM3_ESM.pdf]
