# Supplementary material for: Epigenetically upregulated oncoprotein PLCE1 drives esophageal carcinoma angiogenesis and proliferation via activating the PI-PLCε-NF-κB signaling pathway and VEGF-C/ Bcl-2 expression
Source: Springer Nature journal article supplement (doi:10.1186/s12943-018-0930-x), 2019-01-04

**Fig. S3**

**a**

|           |   |   |   |   |   |
|-----------|---|---|---|---|---|
| control   | - | - | - | + | - |
| ShR-PLCE1 | - | + | + | - | + |
| TPA       | - | - | + | - | - |
| BIM       | - | - | - | + | + |

Eca109

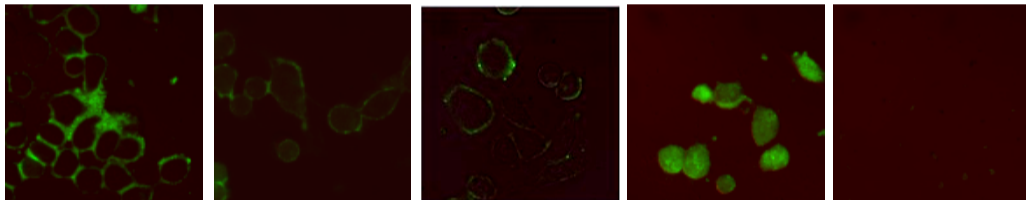

EC9706

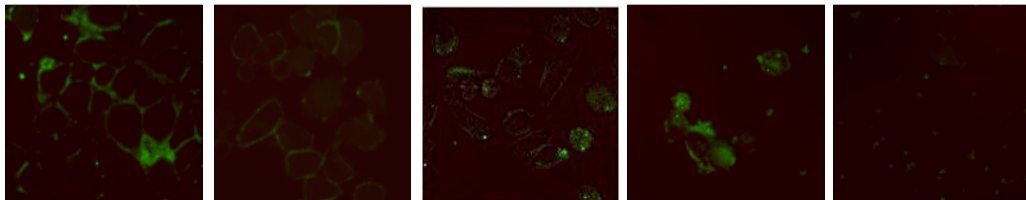

Supplement: MOESM4 [file 16376006]
