# Supplementary material for: Epigenetically upregulated oncoprotein PLCE1 drives esophageal carcinoma angiogenesis and proliferation via activating the PI-PLCε-NF-κB signaling pathway and VEGF-C/ Bcl-2 expression
Source: Springer Nature journal article supplement (doi:10.1186/s12943-018-0930-x), 2019-01-04

Fig. S4

**a**

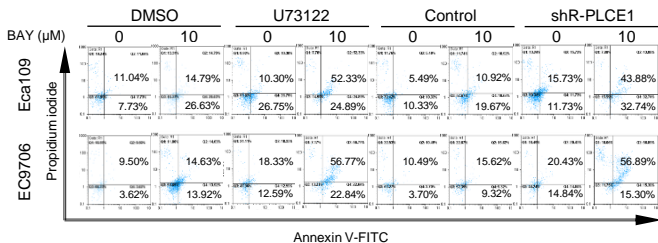

**b**

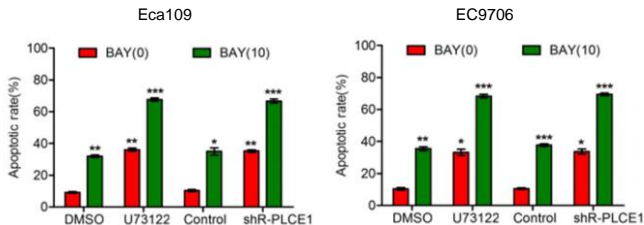

**c**

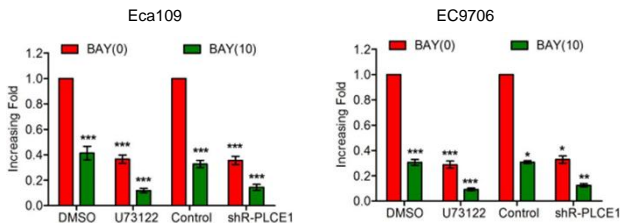

Supplement: MOESM5 [file 16376006]
